# Supplementary material for: Peginterferon Alfa-2a and Ribavirin in Latino and Non-Latino Whites with Hepatitis C
Source: Atypon-hosted journal article supplement (doi:10.1056/nejmoa0805062), 2009-01-14

## Supplementary Appendix

This appendix has been provided by the authors to give readers additional information about their work.

Supplement to: Rodriguez-Torres M, Jeffers LJ, Sheikh MY, et al. Peginterferon alfa-2a and ribavirin in Latino and non-Latino whites with hepatitis C. *N Engl J Med* 2009;360:257-67.

## Supplementary Information

### **Guidelines for adjusting doses of peginterferon alfa-2a and ribavirin.**

The dose of peginterferon alfa-2a was reduced if absolute neutrophil count (ANC) dropped to  $<750/\text{mm}^3$  or if the platelet count dropped to  $<50,000/\text{mm}^3$ , and discontinued if ANC dropped to  $<500/\text{mm}^3$  or the platelet count was  $<25,000/\text{mm}^3$ . Ribavirin dose was reduced in 200 mg/day decrements (to a lowest dose of 600 mg/day) for hemoglobin levels of 8.5–10 g/dL, or for patients with stable cardiovascular disease who experienced a fall in hemoglobin of  $\geq 2$  g/dL in any 4-week treatment period. The dose could be increased again at the clinician's discretion. Ribavirin was discontinued if hemoglobin decreased to  $<8.5$  g/dL, or if a patient with stable cardiovascular disease maintained hemoglobin  $<10$  g/dL despite 4 weeks of a reduced dose.

**Table 1. SVR rates as a function of demographic and baseline characteristics for Latinos and non-Latinos.**

| Characteristic           | Latino (n=269) |      | Non-Latino (n=300) |      |
|--------------------------|----------------|------|--------------------|------|
|                          | n              | %    | n                  | %    |
| Country of origin        |                |      |                    |      |
| Mexico                   | 137            | 32.1 | –                  | –    |
| Puerto Rico              | 87             | 34.5 | –                  | –    |
| Cuba and others          | 45             | 35.6 | –                  | –    |
| Sex                      |                |      |                    |      |
| Male                     | 183            | 32.8 | 192                | 53.1 |
| Female                   | 86             | 34.9 | 108                | 42.6 |
| Age                      |                |      |                    |      |
| ≤40 yr                   | 75             | 40.0 | 49                 | 59.2 |
| >40 yr                   | 194            | 30.9 | 251                | 47.4 |
| BMI (kg/m <sup>2</sup> ) |                |      |                    |      |
| ≤27                      | 86             | 30.2 | 141                | 46.1 |
| >27                      | 175            | 35.4 | 152                | 52.6 |
| BMI (kg/m <sup>2</sup> ) |                |      |                    |      |
| ≤30                      | 153            | 30.7 | 218                | 48.6 |
| >30                      | 108            | 38.0 | 75                 | 52.0 |
| ALT Quotient             |                |      |                    |      |
| ≤3 X ULN                 | 203            | 36.5 | 250                | 46.0 |
| >3 X ULN                 | 66             | 24.2 | 50                 | 66.0 |
| HCV-RNA titers           |                |      |                    |      |
| ≤400,000 IU/mL           | 40             | 52.5 | 46                 | 71.7 |
| >400,000 IU/mL           | 229            | 30.1 | 254                | 45.3 |
| HCV-RNA titers           |                |      |                    |      |
| ≤800,000 IU/mL           | 67             | 44.8 | 72                 | 59.7 |
| >800,000 IU/mL           | 202            | 29.7 | 228                | 46.1 |
| Cirrhotic Classification |                |      |                    |      |
| Noncirrhotic             | 233            | 35.2 | 271                | 50.2 |
| Cirrhotic                | 36             | 22.2 | 29                 | 41.4 |

**Table 2. Ribavirin and peginterferon alfa-2a dose reductions by weight quartiles**

| <b>Weight (Quartiles)</b>                                       | <b>&lt;70.9<br/>kg</b> | <b>≥70.9, &lt;81.2<br/>kg</b> | <b>≥81.2, &lt;94.5<br/>kg</b> | <b>≥94.5<br/>kg</b> | <b>Total</b>  |
|-----------------------------------------------------------------|------------------------|-------------------------------|-------------------------------|---------------------|---------------|
| <b>Latino</b>                                                   |                        |                               |                               |                     |               |
| n                                                               | 67                     | 76                            | 67                            | 59                  | 269           |
| Patients with ribavirin<br>dose reduction, n (%)                | 30<br>(44.8)           | 40<br>(52.6)                  | 18<br>(26.9)                  | 7<br>(11.9)         | 95<br>(35.3)  |
| Patients with<br>peginterferon alfa-2a<br>dose reduction, n (%) | 21<br>(31.3)           | 22<br>(28.9)                  | 10<br>(14.9)                  | 10<br>(16.9)        | 63<br>(23.4)  |
| <b>Non-Latino</b>                                               |                        |                               |                               |                     |               |
| n                                                               | 72                     | 68                            | 75                            | 84                  | 299           |
| Patients with ribavirin<br>dose reduction, n (%)                | 35<br>(48.6)           | 27<br>(39.7)                  | 18<br>(24.0)                  | 27<br>(32.1)        | 107<br>(35.8) |
| Patients with<br>peginterferon alfa-2a<br>dose reduction, n (%) | 28<br>(38.9)           | 20<br>(29.4)                  | 14<br>(18.7)                  | 18<br>(21.4)        | 80<br>(26.8)  |

**Fig. 1a. Ribavirin Dose Ranges.**

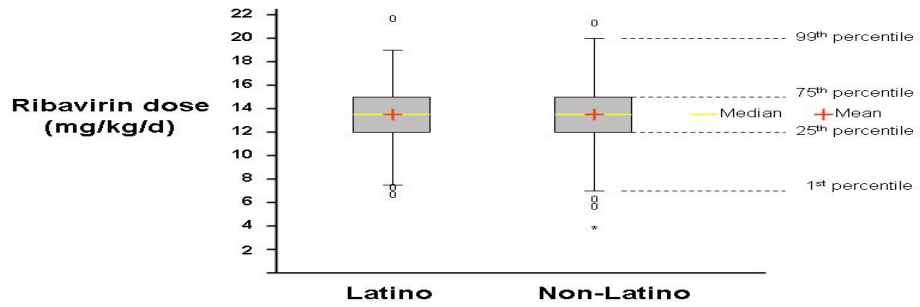

**Fig. 1b. Peginterferon Alfa-2a Dose Ranges.**

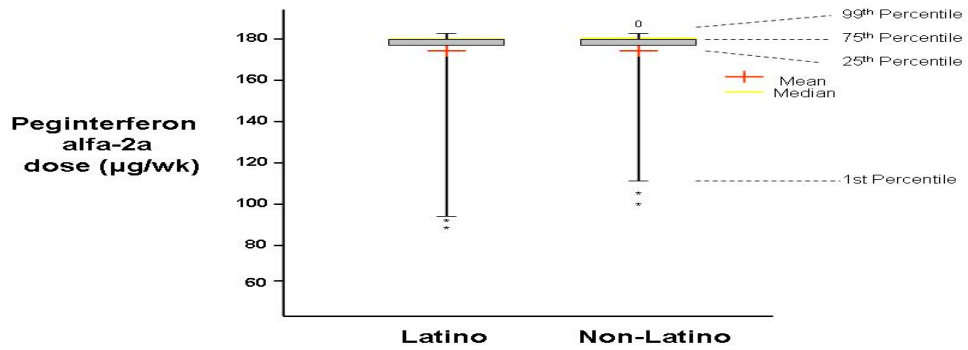

Supplement: nejm_rodriguez-torres_257sa1.pdf [file nejm_rodriguez-torres_257sa1.pdf]
